# Supplementary material for: In situ exsolved Co nanoparticles coupled on LiCoO2 nanofibers to induce oxygen electrocatalysis for rechargeable Zn–air batteries
Source: Royal Society of Chemistry journal article supplement (doi:10.1039/d0ta07362h), 2020-01-01
Supplement: d0ta07362h1.pdf [file d0ta07362h1.pdf]

## Supporting information

### **In-situ exsolved Co nanoparticles coupled on LiCoO<sub>2</sub> nanofibers to induce oxygen electrocatalysis for rechargeable Zn-air batteries**

Liangqi Gui,<sup>a</sup> Yuzhou Liu,<sup>a</sup> Jing Zhang,<sup>a</sup> Beibei He,<sup>a,b,\*</sup> Qing Wang,<sup>c</sup> and Ling Zhao.<sup>a,b,\*</sup>

<sup>a</sup>Faculty of Materials Science and Chemistry, China University of Geosciences, Wuhan, 430074, China.

<sup>b</sup>Zhejiang Institute, China University of Geosciences (Wuhan), Hangzhou, 311305, China.

<sup>c</sup>Department of Materials Science and Engineering, Pennsylvania State University, University Park, Pennsylvania 16802, USA.

\*Corresponding author. Email: babyfly@mail.usc.edu.cn (Beibei He), zhaoling@cug.edu.cn (Ling Zhao)

## Experimental Section

### Materials synthesis

*Synthesis of LiCoO<sub>2</sub> and Co@LiCoO<sub>2</sub> nanofibers:* LiCoO<sub>2</sub> nanofibers (LCO-NFs) were synthesized via an electrospinning method. First, cobalt nitrate hexahydrate (Co(NO<sub>3</sub>)<sub>2</sub>•6H<sub>2</sub>O) and lithium nitrate (LiNO<sub>3</sub>) were introduced into N, N-dimethylformamide (DMF) solvent to obtain an uniform solution. Subsequently, polyvinylpyrrolidone (PVP, Mw = 1,300,000) was added to such solution, followed by stirring constantly for 4 h. The mass ratio of total metal salt: PVP: DMF was 1: 1: 8. Then, the as-prepared spinning solution was transferred into a plastic syringe, followed by electrospinning at an voltage of 18 kV, a distance between needle and rolling collector of 15 cm, and a feeding rate of 0.3 mL h<sup>-1</sup>. The obtained precursor nanofibers were dried at 60 °C in a vacuum oven for 12 h. Then, the dried fresh nanofibers were heat-treated at 600 °C for 2 h in air to gain the LCO-NFs. Finally, the LCO-NFs were annealing at 350 °C for 2 h in 5 % H<sub>2</sub> - 95 % Ar to form in-situ exsolved Co@LiCoO<sub>2</sub> nanofibers (Co@LCO-NFs).

*Preparation of LiCoO<sub>2</sub> bulk:* The LiCoO<sub>2</sub> bulk (LCO-bulk) was prepared via a traditional sol-gel approach. Typically, 0.02 mol LiNO<sub>3</sub> and 0.02 mol Co(NO<sub>3</sub>)<sub>2</sub>•6H<sub>2</sub>O were dissolved in the deionized water, followed by the introduction of chelating agents of 0.04 mol citric acid and 0.06 mol EDTA. NH<sub>3</sub>•H<sub>2</sub>O was applied to tune the pH value (~7). The obtained solution was heated till self-combustion occurred. Finally, the solid precursor was sintered at 600 °C for 2 h in air to obtain LCO-bulk.

### Materials characterization

Crystal structures of as-prepared LCO-bulk, LCO-NFs and Co@LCO-NFs samples were analyzed via X-ray diffraction (XRD, Bruker D8-Focus). Morphologies of these resultant catalysts were observed by field-emission scanning electron microscope (FESEM, Hitachi SU-8010) and high-

resolution transmission electron microscopy (HRTEM, Tecnai G2 F20 U-TWIN). Surface electronic structures of catalysts were carried out by X-ray photo-electron spectroscopy (XPS, Kratos Axis Ultra DLD) equipped with  $Al_{K\alpha}$  excitation source. Typical XPS spectra were fitted based on XPSPEAK software. Surface oxygen vacancies of catalysts were further examined by electron paramagnetic resonance (EPR) at room temperature on a Bruker-A300 EPR spectrometer. Hydrogen temperature programmed reduction ( $H_2$ -TPR) was performed via the AutoChem II 2920 instrument (Micromeritics, USA) equipped with a thermal conductivity detector (TCD) under 5%  $H_2$ -95% Ar atmosphere with temperature ranging from 25 °C to 400 °C at a heating rate of 10 °C  $min^{-1}$ .

### **Density functional theory calculations**

First-principle calculations were performed by density functional theory (DFT) based on the Vienna Ab-initio Simulation Package (VASP) package.<sup>1</sup> Generalized gradient approximation (GGA) with Perdew–Burke–Ernzerhof (PBE) functional<sup>2</sup> were adopted to address the electronic exchange and correlation effects. Uniform G-centered k-points meshes with a resolution of  $2\pi \cdot 0.03 \text{ \AA}^{-1}$  and Methfessel-Paxton electronic smearing were applied for geometric optimization. The simulations were conducted with a cutoff energy of 500 eV. These settings ensure convergence of the total energies to within 1 meV per atom. Structure relaxation proceeded until all forces on atoms were less than 1 meV  $\text{\AA}^{-1}$  and the total stress tensor was within 0.01 GPa of the target value. In view of the strong-correlation of d electrons in Co, a U–J parameter of 5 eV was adopted.<sup>3</sup> For the construction of  $Co@LiCoO_2$  heterostructure, we first spliced put double-layer  $LiCoO_2$  on Co system along (001) direction since both materials adopt hexagonal structures and their lattice constants were matched. For the  $LiCoO_2$  and  $Co@LiCoO_2$  systems, their (100) planes served as the reaction surfaces, since they could predominantly expose Co atoms in an octahedral environment, and the vacuum space was 12  $\text{\AA}$ .

According to hydrogen electrode (CHE) model, the adsorption free energy for reaction intermediates, including  $\text{OH}^*$ ,  $\text{O}^*$  and  $\text{OOH}^*$ , was expressed by the following equation:

$$\Delta G_{\text{ads}} = \Delta E_{\text{ads}} + \Delta E_{\text{ZPE}} - T\Delta S$$

Where  $\Delta E_{\text{ads}}$  was the adsorption energy change of adsorbates,  $E_{\text{ZPE}}$  was the zero energy calculated from the vibrational frequencies,  $\Delta S$  was the entropy change, and  $T$  was the room temperature. Generally, in alkaline media, a widely accepted OER reaction mechanism could be expressed as 4-electron process:

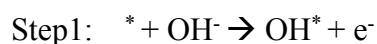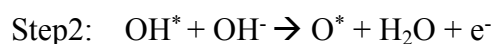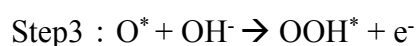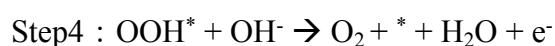

where  $*$  presented an adsorption site on the catalyst, and  $\text{OH}^*$ ,  $\text{O}^*$ , and  $\text{OOH}^*$  denoted the corresponding adsorbed intermediates. In the case of ORR, its reaction mechanism was the opposite to OER.

### **Electrochemical measurement**

Catalyst ink, consisting of 4 mg of activated carbon, 16 mg of as-obtained catalyst, 3.9 mL of anhydrous ethanol and 0.1 mL of 5 wt% Nafion solution (Sigma-Aldrich), was prepared by ultrasonication for 30 minutes. Subsequently, the polished glassy carbon electrode with a diameter of 3 mm was covered by 4  $\mu\text{L}$  of the resultant catalyst ink. For assessing the activity and durability of LCO-bulk, LCO-NFs and Co@LCO-NFs electrocatalysts, cyclic voltammogram (CV), electrochemical impedance spectroscopy (EIS), linear sweep voltammogram (LSV), rotating ring-disk

electrode (RRDE) and chronoamperometry were carried out in an electrochemical station (CHI760E) with a standard three-electrode system. Glossy carbon electrode with a catalyst loading of  $0.2830 \text{ mg cm}^{-2}$  ( $0.2264 \text{ mg}_{\text{cat}} \text{ cm}^{-2}$ ) was studied as the working electrode. Graphite rod electrode was used as the counter electrode. Hg/HgO electrode served as the reference electrode. And, 0.1 M KOH solution was applied as the electrolyte. The measured potential with iR correction was revised to reversible hydrogen electrode (RHE) potential.

### **Zn-air batteries test**

Home-made Zn-air batteries were assembled with a configuration of an anode (Zn sheet), an electrolyte (6 M KOH and 0.2 M  $\text{Zn}(\text{CH}_3\text{COO})_2$ ) and an air electrode (carbon paper with catalyst loading of  $1 \text{ mg}_{\text{cat}} \text{ cm}^{-2}$ ). A mixture of commercial Pt/C and  $\text{IrO}_2$  with a mass ratio of 1:1 were also studied as a referenced air electrode. A nickel mesh was applied as the current collector. The discharge process curves were gotten via the electrochemical station (CHI760E) with a two-electrode system. Discharge-charge performance of the batteries were performed by a multichannel battery testing system (LAND CT2001A) at a current density of  $10 \text{ mA cm}^{-2}$  with 5 min discharge and 5 min charge. Specific capacities of batteries were derived from the galvanostatical discharge plots.

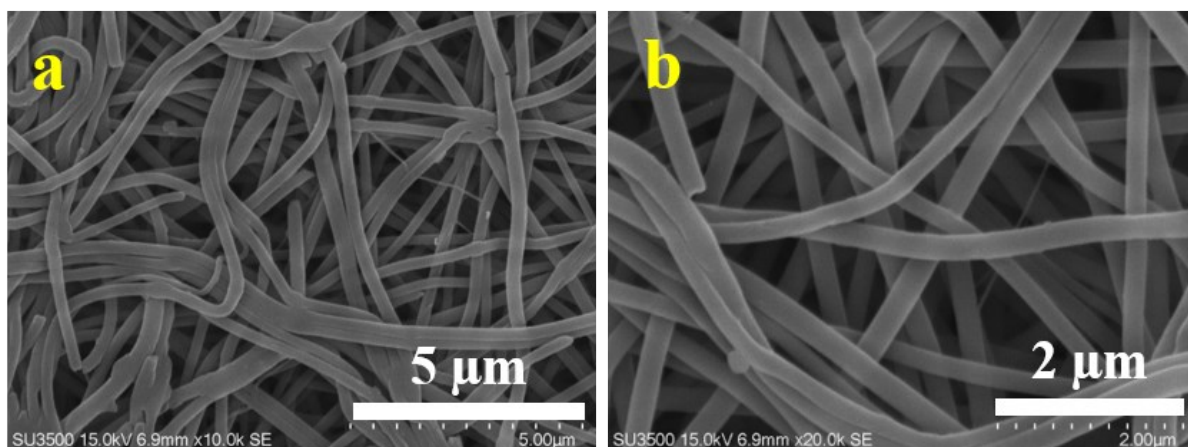

Figure S1. FESEM images of as-spun precursor nanofibers at different magnifications: (a)×10000, (b)×20000.

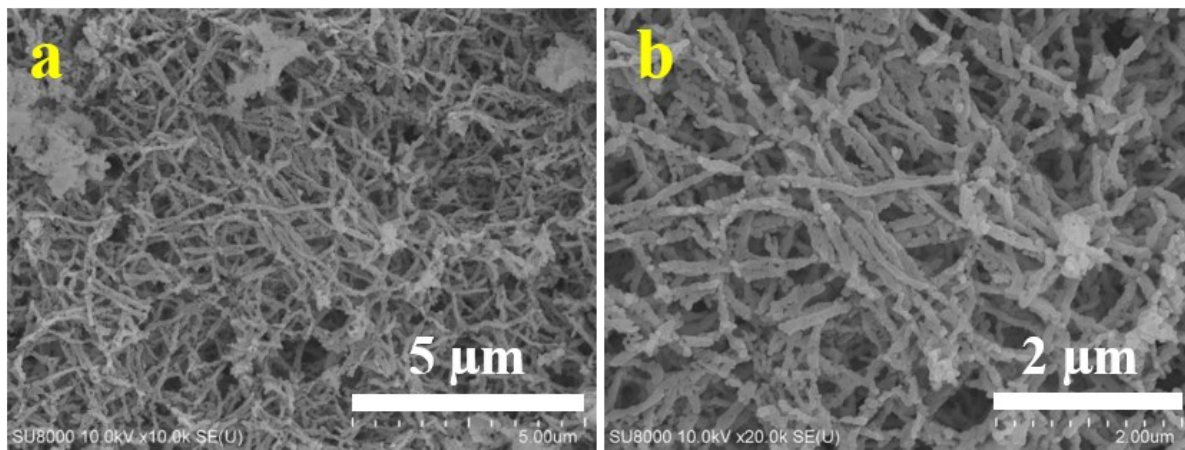

Figure S2. FESEM images of LCO-NFs at different magnifications: (a)×10000, (b)×20000.

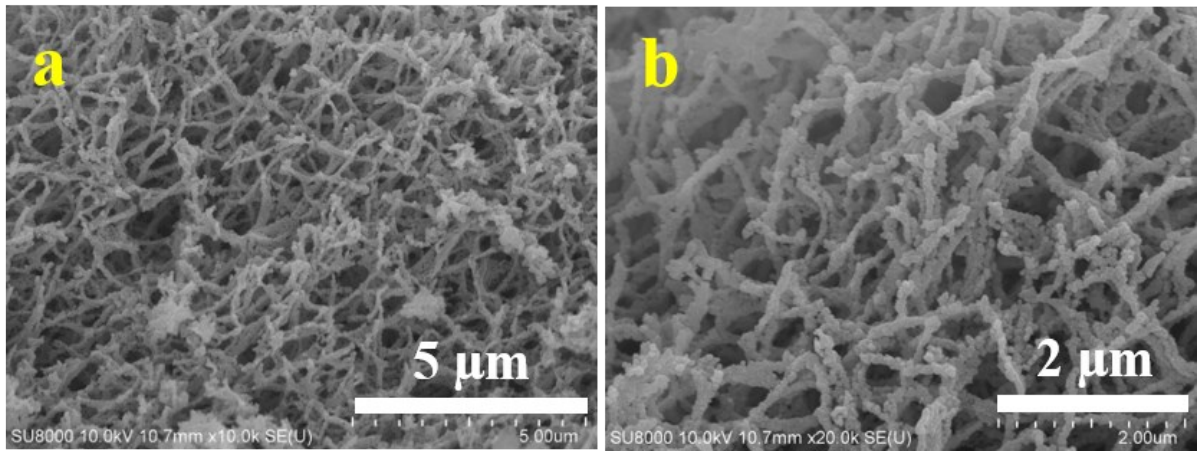

Figure S3. FESEM images of Co@LCO-NFs at different magnifications: (a)×10000, (b)×20000.



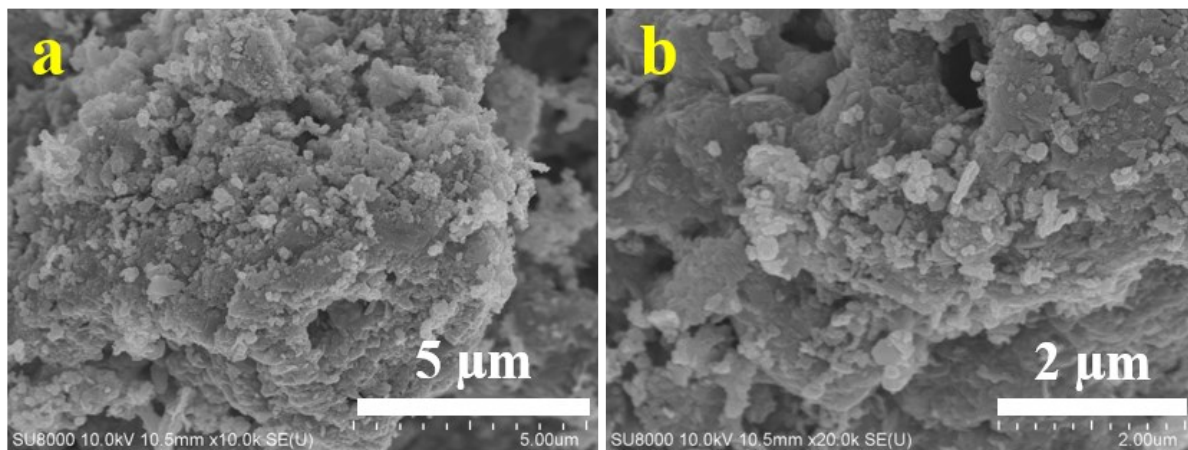

Figure S4. FESEM images of LCO-bulk at different magnifications: (a)×10000, (b)×20000.

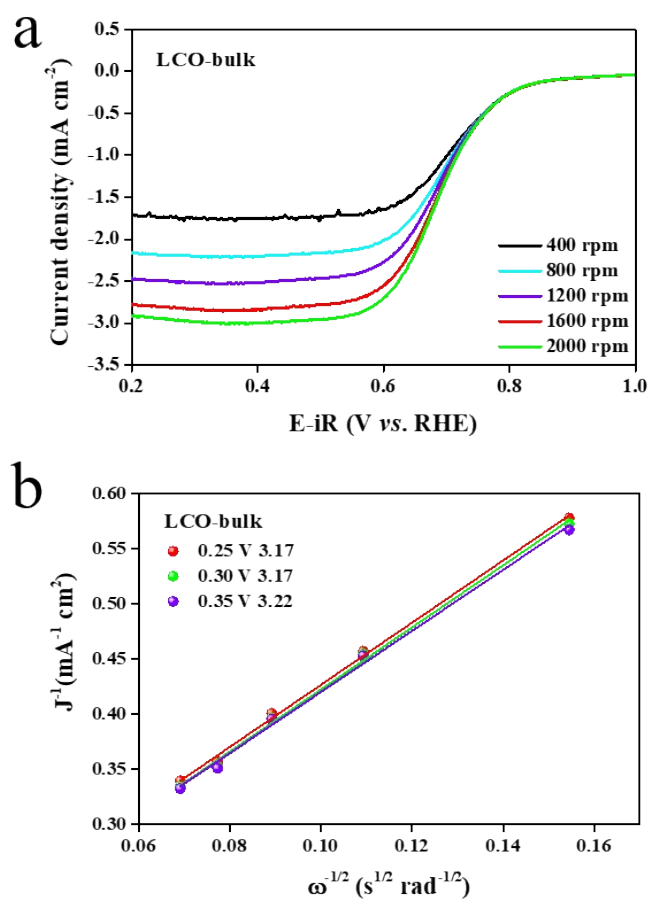

Figure S5. (a) Rotating-disk voltammograms of LCO-bulk catalyst with a sweep rate of 10 mV s<sup>-1</sup> at the various rotation speeds rates in O<sub>2</sub>-saturated 0.1 M KOH, (b) The corresponding Koutecky-Levich plots of LCO-bulk catalyst under different applied potentials.

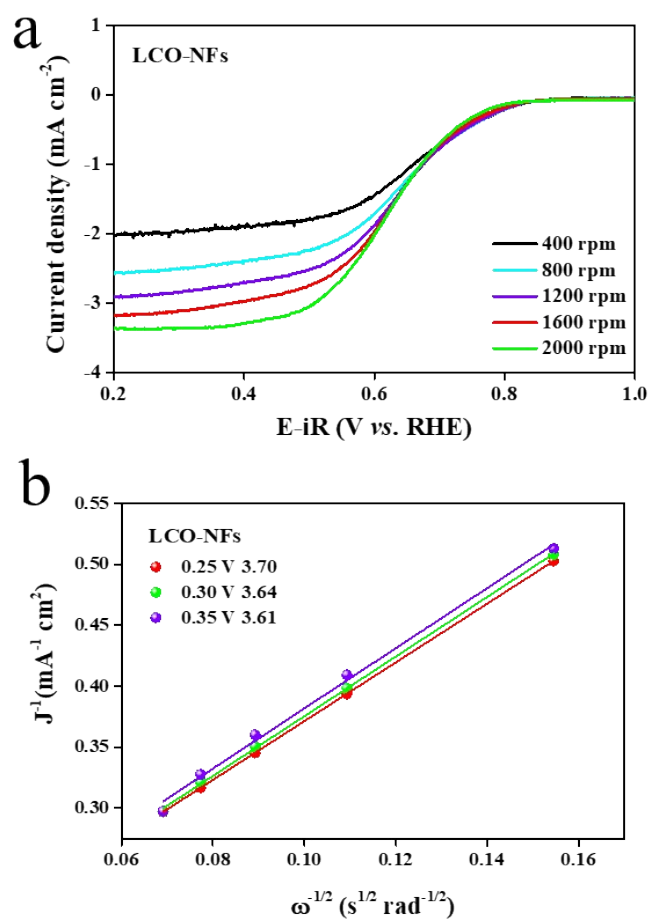

Figure S6. (a) Rotating-disk voltammograms of LCO-NFs catalyst with a sweep rate of  $10 \text{ mV s}^{-1}$  at the various rotation speeds rates in  $\text{O}_2$ -saturated  $0.1 \text{ M KOH}$ , (b) The corresponding Koutecky-Levich plots of LCO-NFs catalyst under different applied potentials.

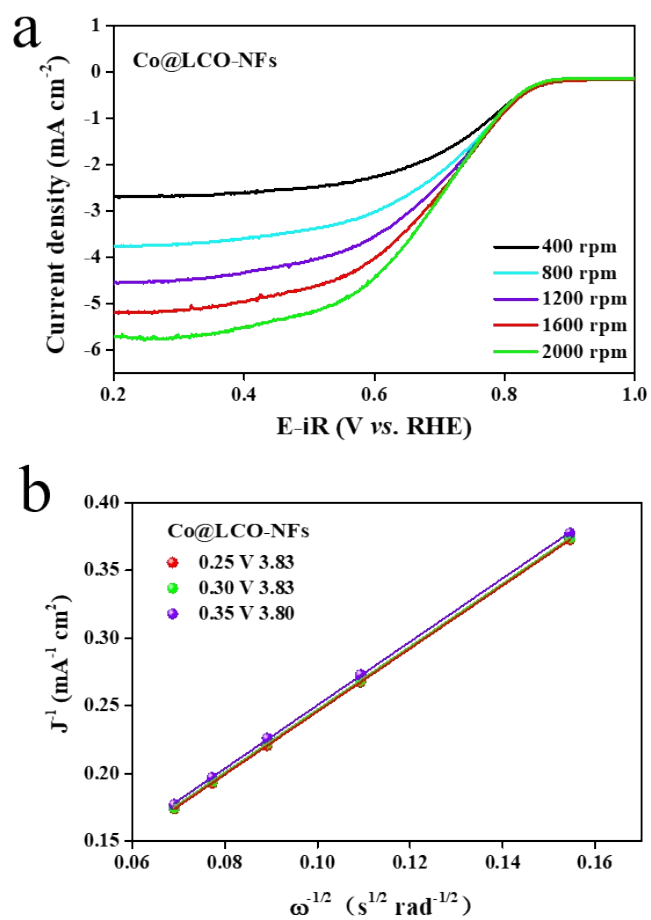

Figure S7. (a) Rotating-disk voltammograms of Co@LCO-NFs catalyst with a sweep rate of 10  $\text{mV s}^{-1}$  at the various rotation speeds rates in  $\text{O}_2$ -saturated 0.1 M KOH, (b) The corresponding Koutecky-Levich plots of Co@LCO-NFs catalyst under different applied potentials.

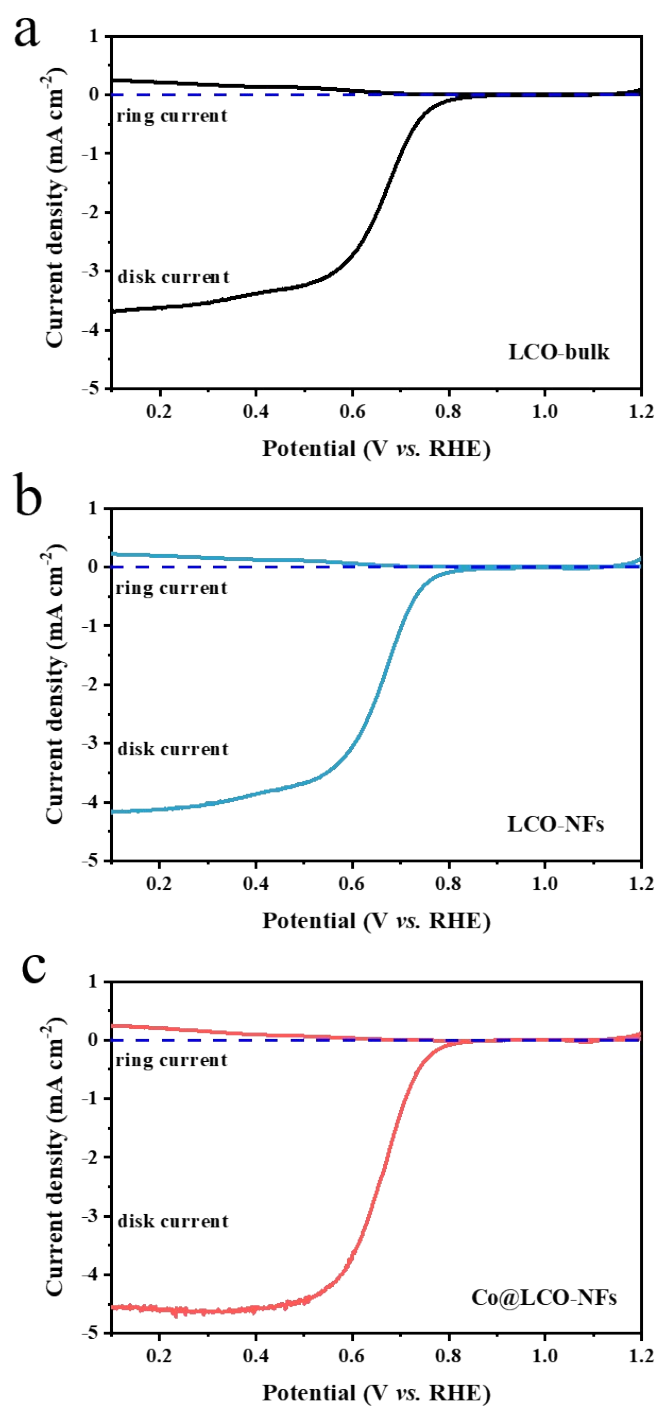

Figure S8. Rotating ring-disk electrode (RRDE) scans on (a) LCO-bulk, (b) LCO-NFs and (c) Co@LCO-NFs catalysts.

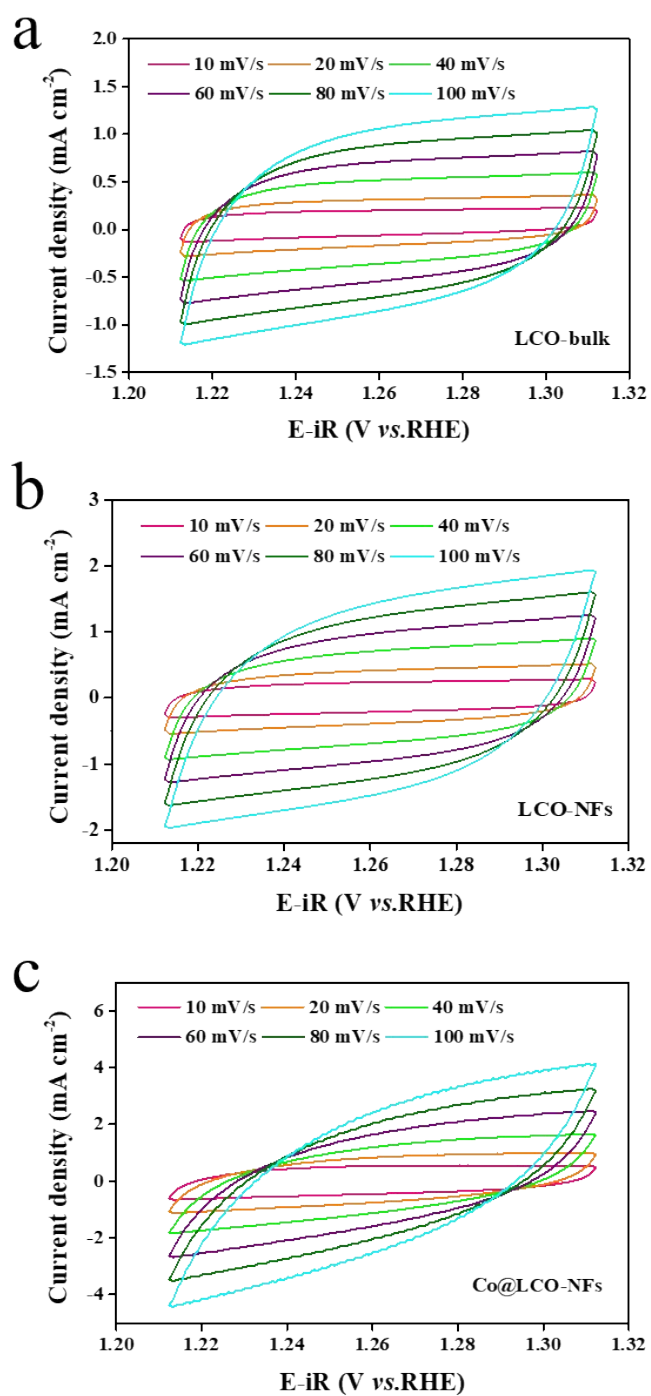

Figure S9. Electrochemical CV curves of (a) LCO-bulk, (b) LCO-NFs and (c) Co@LCO-NFs catalysts at different scan rates of 10, 20, 40, 60, 80, and 100  $\text{mV s}^{-1}$ .

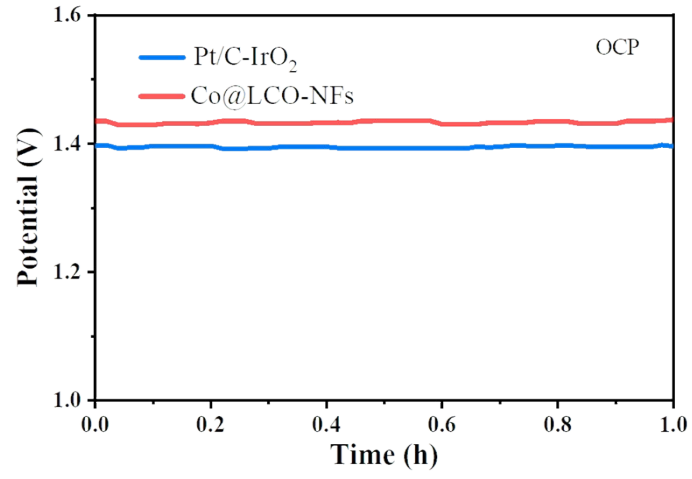

Figure S10. Open circuit voltage tests of Zn-air batteries with Co@LCO-NFs and Pt/C+IrO<sub>2</sub> air electrodes.

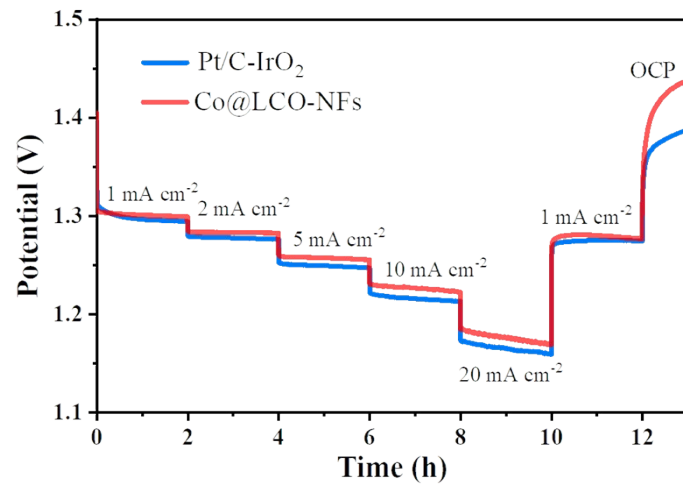

Figure S11. Voltage platforms at various discharge current densities of Zn-air batteries with Co@LCO-NFs and Pt/C+IrO<sub>2</sub> air electrodes.



Table S1. Co valence state concentration of LCO-NFs and Co@LCO-NFs catalysts derived from XPS peak deconvolution.

| Electrocatalyst | Co <sup>2+</sup> | Co <sup>3+</sup> | Co <sup>0</sup> |
|-----------------|------------------|------------------|-----------------|
| LCO-NFs         | 16.95 %          | 83.05 %          | -               |
| Co@LCO-NFs      | 30.33 %          | 51.64 %          | 18.03 %         |

Table S2. O 1s XPS peak deconvolution results of LCO-NFs and Co@LCO-NFs catalysts.

| Electrocatalyst | O <sup>2-</sup> | O <sub>2</sub> <sup>2- / O<sup>-</sup></sup> | OH/O <sub>2</sub> | H <sub>2</sub> O |
|-----------------|-----------------|----------------------------------------------|-------------------|------------------|
| LCO-NFs         | 41.99 %         | 19.95 %                                      | 17.24 %           | 20.82 %          |
| Co@LCO-NFs      | 25.93 %         | 30.13 %                                      | 27.48 %           | 16.46 %          |

Table S3. Comparison of electrochemical performance of rechargeable Zn-air batteries with different electrodes.

| Catalyst                                                                                                  | Open circuit voltage (V) | Peak power density (mW cm <sup>-2</sup> ) | Recharge ability                     | Specific capacity                                      | Ref.                                                      |
|-----------------------------------------------------------------------------------------------------------|--------------------------|-------------------------------------------|--------------------------------------|--------------------------------------------------------|-----------------------------------------------------------|
| <b>Co@LCO-NFs</b>                                                                                         | <b>1.43</b>              | <b>198</b>                                | <b>600 s / cycle for 1200 cycles</b> | <b>791 mAh g<sup>-1</sup> at 10 mA cm<sup>-2</sup></b> | <b>This work</b>                                          |
| Pt-Sr(Co <sub>0.8</sub> Fe <sub>0.2</sub> ) <sub>0.95</sub> P <sub>0.05</sub> O <sub>3-δ</sub>            | 1.40                     | 122                                       | 1200 s / cycle for 240 cycles        | 790 mAh g <sup>-1</sup> at 10 mA cm <sup>-2</sup>      | Adv. Energy Mater., 2019, 10, 1903271 <sup>4</sup>        |
| FePc@N,P-DC                                                                                               | 1.45                     | 120                                       | 200 s / cycle for 900 cycles         | 585 mAh g <sup>-1</sup> at 10 mA cm <sup>-2</sup>      | Appl. Catal. B: Environ., 2020, 260, 118198 <sup>5</sup>  |
| FeNi <sub>3</sub> @NC                                                                                     | 1.39                     | 139                                       | 3600 s / cycle for 30 cycles         | 756 mAh g <sup>-1</sup> at 10 mA cm <sup>-2</sup>      | Appl. Catal. B: Environ., 2020, 268, 118729 <sup>6</sup>  |
| CuSA@HNCN <sub>x</sub>                                                                                    | 1.51                     | 202                                       | 600 s / cycle for 1500 cycles        | 793 mAh g <sup>-1</sup> at 25 mA cm <sup>-2</sup>      | Appl. Catal. B: Environ., 2020, 268, 118746 <sup>7</sup>  |
| CoP-PrBa <sub>0.5</sub> Sr <sub>0.5</sub> Co <sub>1.5</sub> Fe <sub>0.5</sub> O <sub>5+δ</sub> nanofibers | -                        | 138                                       | 1200 s / cycle for 100 cycles        | -                                                      | J. Mater. Chem. A., 2019, 7, 26607–26617 <sup>8</sup>     |
| Co-SAs@NC                                                                                                 | 1.46                     | 105.3                                     | -                                    | 897.1 mA h g <sup>-1</sup> at 20 mA cm <sup>-2</sup>   | Angew. Chem., Int. Ed., 2019, 58, 5359-5364. <sup>9</sup> |
| Mn/Fe-HIB-MOF                                                                                             | ~1.48                    | 195                                       | 600 s / cycle for over 6000 cycles   | 769 mAh g <sup>-1</sup> at 5 mA cm <sup>-2</sup>       | Energy Environ. Sci., 2019, 12, 727-738 <sup>10</sup>     |
| Cobalt-coordinated framework porphyrin with graphene                                                      | -                        | 78                                        | 1200 s / cycle for 237 cycles        | -                                                      | Adv. Mater., 2019, 31, 1900592 <sup>11</sup>              |
| Gd <sub>2</sub> O <sub>3</sub> -Co/NG                                                                     | -                        | 114.3                                     | 600 s / cycle for 160 cycles         | 735 mAh g <sup>-1</sup> at 5 mA cm <sup>-2</sup>       | Adv. Energy Mater., 2020, 10, 1903833 <sup>12</sup>       |

## References:

1. G. Kresse and J. Furthmuller, *Physical Review B*, 1996, **54**, 11169-11186.
2. J. P. Perdew, K. Burke and M. Ernzerhof, *Physical Review Letters*, 1996, **77**, 3865-3868.
3. J. A. Santana, J. Kim, P. R. C. Kent and F. A. Reboredo, *J. Chem. Phys.*, 2014, **141**.
4. X. X. Wang, J. Sunarso, Q. Lu, Z. L. Zhou, J. Dai, D. Q. Guan, W. Zhou and Z. P. Shao, *Advanced Energy Materials*, 2020, **10**.
5. W. Cheng, P. Yuan, Z. Lv, Y. Guo, Y. Qiao, X. Xue, X. Liu, W. Bai, K. Wang, Q. Xu and J. Zhang, *Applied Catalysis B: Environmental*, 2020, **260**, 118198.
6. D. Chen, J. Zhu, X. Mu, R. Cheng, W. Li, S. Liu, Z. Pu, C. Lin and S. Mu, *Applied Catalysis B: Environmental*, 2020, **268**, 118729.
7. N. K. Wagh, S. S. Shinde, C. H. Lee, J.-Y. Jung, D.-H. Kim, S.-H. Kim, C. Lin, S. U. Lee and J.-H. Lee, *Applied Catalysis B: Environmental*, 2020, **268**, 118746.
8. Y.-Q. Zhang, H.-B. Tao, Z. Chen, M. Li, Y.-F. Sun, B. Hua and J.-L. Luo, *Journal of Materials Chemistry A*, 2019, **7**, 26607-26617.
9. X. P. Han, X. F. Ling, Y. Wang, T. Y. Ma, C. Zhong, W. B. Hu and Y. D. Deng, *Angewandte Chemie-International Edition*, 2019, **58**, 5359-5364.
10. S. S. Shinde, C. H. Lee, J.-Y. Jung, N. K. Wagh, S.-H. Kim, D.-H. Kim, C. Lin, S. U. Lee and J.-H. Lee, *Energy & Environmental Science*, 2019, **12**, 727-738.
11. B.-Q. Li, C.-X. Zhao, S. Chen, J.-N. Liu, X. Chen, L. Song and Q. Zhang, *Adv. Mater.*, 2019, **31**, 1900592.
12. M. Li, Y. Wang, Y. Zheng, G. Fu, D. Sun, Y. Li, Y. Tang and T. Ma, *Advanced Energy Materials*, 2020, **10**, 1903833.
